# Supplementary material
Source: PubMed Central journal article supplement (PMC5335507)
Supplement: MCB.00491-16_zmb999101432s1.pdf [file MCB.00491-16_zmb999101432s1.pdf]

## Supplemental material

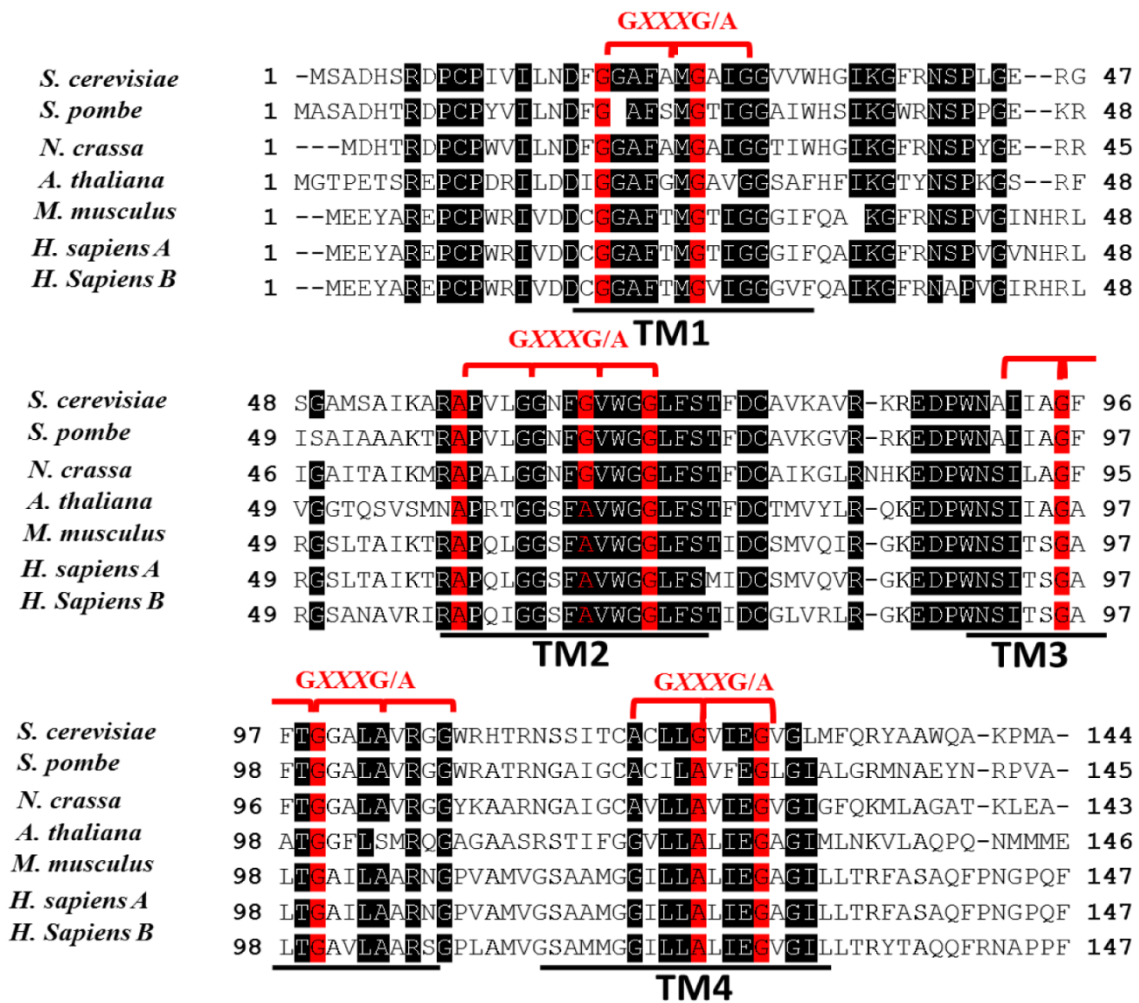

**Fig. S1** Sequence alignment of Tim17 protein from different species. (A) Orthologous Tim17 sequences from different species including *S. cerevisiae*, *N. crassa*, *S. pombe*, *A. thaliana*, *M. musculus* and *H. sapiens* were aligned using ClustalW2 online tool. The position of transmembrane helices TM1-TM4 has been indicated. The sequence corresponding to the G/AXXXG/A motif and the position of the conditional mutants isolated are highlighted in red colour.

**Table S1:** Yeast strains used in this study.

| Strain                                | Genotype                                                                                                                             | Source                    |
|---------------------------------------|--------------------------------------------------------------------------------------------------------------------------------------|---------------------------|
| TIM17-316                             | <i>MATa ade2 his3 ura3 leu2 trp1 can1 Tim17Δ::CgHIS3</i><br>[pRS316- <i>Tim17</i> ]                                                  | (Schilke et al.,<br>2012) |
| TIM17-314                             | <i>MATa ade2 his3 ura3 leu2 trp1 can1 Tim17Δ::CgHIS3</i><br>[pRS314- <i>Tim17</i> ]                                                  | This study                |
| TIM17                                 | <i>MATa ade2 his3 ura3 leu2 trp1 can1 Tim17Δ::CgHIS3</i><br>[pRS314- <i>Tim17</i> ]- <i>Tim23-FLAG::kanMX4</i>                       | This study                |
| Tim17 <sub>G19A</sub>                 | <i>MATa ade2 his3 ura3 leu2 trp1 can1 Tim17Δ::CgHIS3</i><br>[pRS314- <i>Tim17</i> <sub>G19A</sub> ]- <i>Tim23-FLAG::kanMX4</i>       | This study                |
| Tim17 <sub>A23L</sub>                 | <i>MATa ade2 his3 ura3 leu2 trp1 can1 Tim17Δ::CgHIS3</i><br>[pRS314- <i>Tim17</i> <sub>A23L</sub> ]- <i>Tim23-FLAG::kanMX4</i>       | This study                |
| Tim17 <sub>G25L</sub>                 | <i>MATa ade2 his3 ura3 leu2 trp1 can1 Tim17Δ::CgHIS3</i><br>[pRS314- <i>Tim17</i> <sub>G25L</sub> ]- <i>Tim23-FLAG::kanMX4</i>       | This study                |
| Tim17 <sub>G19A/A23L</sub>            | <i>MATa ade2 his3 ura3 leu2 trp1 can1 Tim17Δ::CgHIS3</i><br>[pRS314- <i>Tim17</i> <sub>G19A/A23L</sub> ]- <i>Tim23-FLAG::kanMX4</i>  | This study                |
| Tim17 <sub>G29L</sub>                 | <i>MATa ade2 his3 ura3 leu2 trp1 can1 Tim17Δ::CgHIS3</i><br>[pRS314- <i>Tim17</i> <sub>G29L</sub> ]- <i>Tim23-FLAG::kanMX4</i>       | This study                |
| Tim17 <sub>A58L</sub>                 | <i>MATa ade2 his3 ura3 leu2 trp1 can1 Tim17Δ::CgHIS3</i><br>[pRS314- <i>Tim17</i> <sub>A58L</sub> ]- <i>Tim23-FLAG::kanMX4</i>       | This study                |
| Tim17 <sub>G62L</sub>                 | <i>MATa ade2 his3 ura3 leu2 trp1 can1 Tim17Δ::CgHIS3</i><br>[pRS314- <i>Tim17</i> <sub>G62L</sub> ]- <i>Tim23-FLAG::kanMX4</i>       | This study                |
| Tim17 <sub>G66L</sub>                 | <i>MATa ade2 his3 ura3 leu2 trp1 can1 Tim17Δ::CgHIS3</i><br>[pRS314- <i>Tim17</i> <sub>G66L</sub> ]- <i>Tim23-FLAG::kanMX4</i>       | This study                |
| Tim17 <sub>G70L</sub>                 | <i>MATa ade2 his3 ura3 leu2 trp1 can1 Tim17Δ::CgHIS3</i><br>[pRS314- <i>Tim17</i> <sub>G70L</sub> ]- <i>Tim23-FLAG::kanMX4</i>       | This study                |
| Tim17 <sub>A58L/G70L</sub>            | <i>MATa ade2 his3 ura3 leu2 trp1 can1 Tim17Δ::CgHIS3</i><br>[pRS314- <i>Tim17</i> <sub>A58L/G70L</sub> ]- <i>Tim23-FLAG::kanMX4</i>  | This study                |
| Tim17 <sub>A91L</sub>                 | <i>MATa ade2 his3 ura3 leu2 trp1 can1 Tim17Δ::CgHIS3</i><br>[pRS314- <i>Tim17</i> <sub>A91L</sub> ]- <i>Tim23-FLAG::kanMX4</i>       | This study                |
| Tim17 <sub>G95L</sub>                 | <i>MATa ade2 his3 ura3 leu2 trp1 can1 Tim17Δ::CgHIS3</i><br>[pRS314- <i>Tim17</i> <sub>G95L</sub> ]- <i>Tim23-FLAG::kanMX4</i>       | This study                |
| Tim17 <sub>G99L</sub>                 | <i>MATa ade2 his3 ura3 leu2 trp1 can1 Tim17Δ::CgHIS3</i><br>[pRS314- <i>Tim17</i> <sub>G99L</sub> ]- <i>Tim23-FLAG::kanMX4</i>       | This study                |
| Tim17 <sub>A103L</sub>                | <i>MATa ade2 his3 ura3 leu2 trp1 can1 Tim17Δ::CgHIS3</i><br>[pRS314- <i>Tim17</i> <sub>A103L</sub> ]- <i>Tim23-FLAG::kanMX4</i>      | This study                |
| Tim17 <sub>G107L</sub>                | <i>MATa ade2 his3 ura3 leu2 trp1 can1 Tim17Δ::CgHIS3</i><br>[pRS314- <i>Tim17</i> <sub>G107L</sub> ]- <i>Tim23-FLAG::kanMX4</i>      | This study                |
| Tim17 <sub>G123L</sub>                | <i>MATa ade2 his3 ura3 leu2 trp1 can1 Tim17Δ::CgHIS3</i><br>[pRS314- <i>Tim17</i> <sub>G123L</sub> ]- <i>Tim23-FLAG::kanMX4</i>      | This study                |
| Tim17 <sub>G127L</sub>                | <i>MATa ade2 his3 ura3 leu2 trp1 can1 Tim17Δ::CgHIS3</i><br>[pRS314- <i>Tim17</i> <sub>G127L</sub> ]- <i>Tim23-FLAG::kanMX4</i>      | This study                |
| Tim17 <sub>G123L/G127L</sub> -<br>TEF | <i>MATa ade2 his3 ura3 leu2 trp1 can1 Tim17Δ::CgHIS3</i><br>[pRS414- <i>Tim17</i> <sub>G123L/127L</sub> ]- <i>Tim23-FLAG::kanMX4</i> | This study                |
